# Supplementary material
Source: PubMed Central journal article supplement (PMC3400152)
Supplement: NIHMS389450-supplement-Suppl__Info.pdf [file NIHMS389450-supplement-Suppl__Info.pdf]

## Supplemental Information

### Polyketide Proofreading

#### by an Acyltransferase-like Enzyme

Katja Jensen, Holger Niederkrüger, Katrin Zimmermann, Anna L. Vagstad, Jana Moldenhauer, Nicole Brendel, Sarah Frank, Petra Pöplau, Christoph Kohlhaas, Craig A. Townsend, Marco Oldiges, Christian Hertweck, and Jörn Piel

#### Inventory of Supplemental Information

Supplemental Figure 1, Related to Figure 2. HPLC traces of crude extracts of *B. amyloliquefaciens* JM54-2 (bacillaene TE deletion mutant) in comparison to JM157-54 (TE/*baeB* double mutant).

Supplemental Figure 2, Related to Figure 4. Acyltransfer assay using PedD, radiolabeled malonyl-CoA, and two integrated ACPs of the multimodular psymberin PKS.

Supplemental Figure 3, Related to Figure 5. SDS-PAGE analysis of purified PedC used for the hydrolysis assays.

Supplemental Figure 4, Related to Figure 5. Rate versus substrate concentration for the hydrolysis of 3-hydroxybutyryl-SNAC by PedC.

Supplemental Table 1, Related to Supplemental Experimental Procedures. Constructs and their respective antibiotic resistance cassettes, additives, inducer and expression strains.

Supplemental Table 2, Related to Supplemental Experimental Procedures. Sequence of PCR primers used for cloning of obtained constructs.

Supplemental information for  
**Polyketide Proofreading by an Acyltransferase-Like Enzyme**

Katja Jensen,<sup>1</sup> Holger Niederkrüger,<sup>1</sup> Katrin Zimmermann,<sup>1</sup> Anna L. Vagstad,<sup>2</sup> Jana

Moldenhauer,<sup>1</sup> Nicole Brendel,<sup>3</sup> Sarah Frank,<sup>1</sup> Petra Pöplau,<sup>1</sup> Christoph Kohlhaas,<sup>1</sup> Craig A.

Townsend,<sup>2</sup> Marco Oldiges,<sup>4</sup> Christian Hertweck,<sup>3</sup> Jörn Piel<sup>1,\*</sup>

**Supplemental Figure 1, related to Figure 2:** HPLC traces of crude extracts of *B. amyloliquefaciens* JM54-2 (bacillaene TE deletion mutant) in comparison to JM157-54 (TE/*baeB* double mutant). Compounds were identified by LC-HRMS and LC-NMR analysis (Moldenhauer, et al., 2007; Moldenhauer, et al., 2010). In JM157-54 extracts only small amounts of compounds **11** and **13** could be detected.

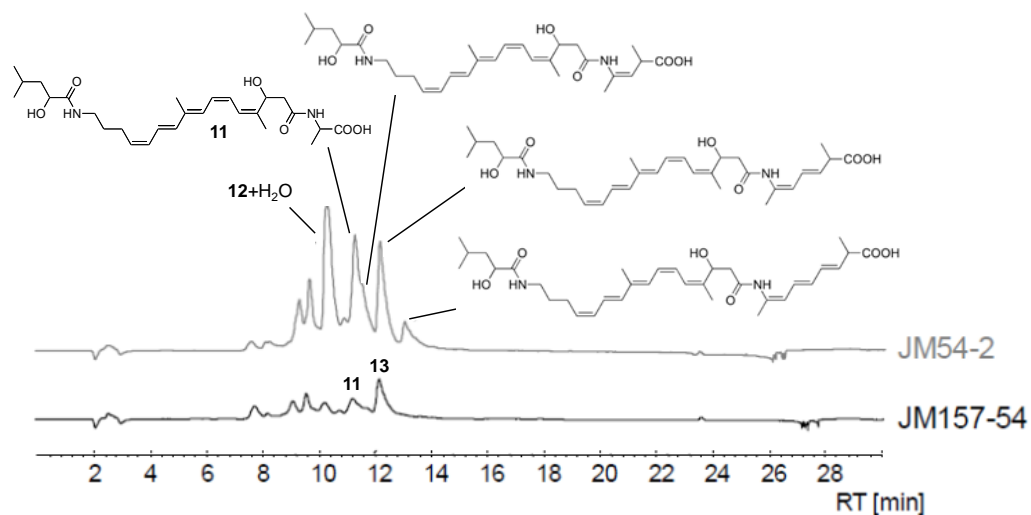

**Supplemental Figure 2, related to Figure 4.** Acyltransfer assay using PedD, radiolabeled malonyl-CoA, and two integrated ACPs of the multimodular psymberin PKS. **A:** SDS-PAGE analysis of assays containing the ACP of PsyA, module 3. Lane 1, PedD only; lane 2a, *holo*-ACP; lane 2b, PedD + *holo*-ACP; lane 3a, *apo*-ACP; lane 3b, PedD + *apo*-ACP. All assays contained [2-<sup>14</sup>C]-malonyl-CoA. **B:** Autoradiogram of the same gel. **C:** SDS-PAGE analysis of assays containing the ACP of PsyD, module 1. Lane 1a, *holo*-ACP; lane 1b, PedD + *holo*-ACP; lane 2a, *apo*-ACP; lane 2b, PedD + *apo*-ACP; lane 3, PedD; lane 4a, *holo*-ACP; lane 4b, PedD + *holo*-ACP, lane 5a, *apo*-ACP; lane 5b, PedD + *apo*-ACP. For assays of lanes 4a to 5b, the ACP was concentrated 10× using Vivaspin ultrafiltration columns (molecular weight cut-off 5000). **D:** Autoradiogram of the same gel. All assays contained [2-<sup>14</sup>C]-malonyl-CoA.

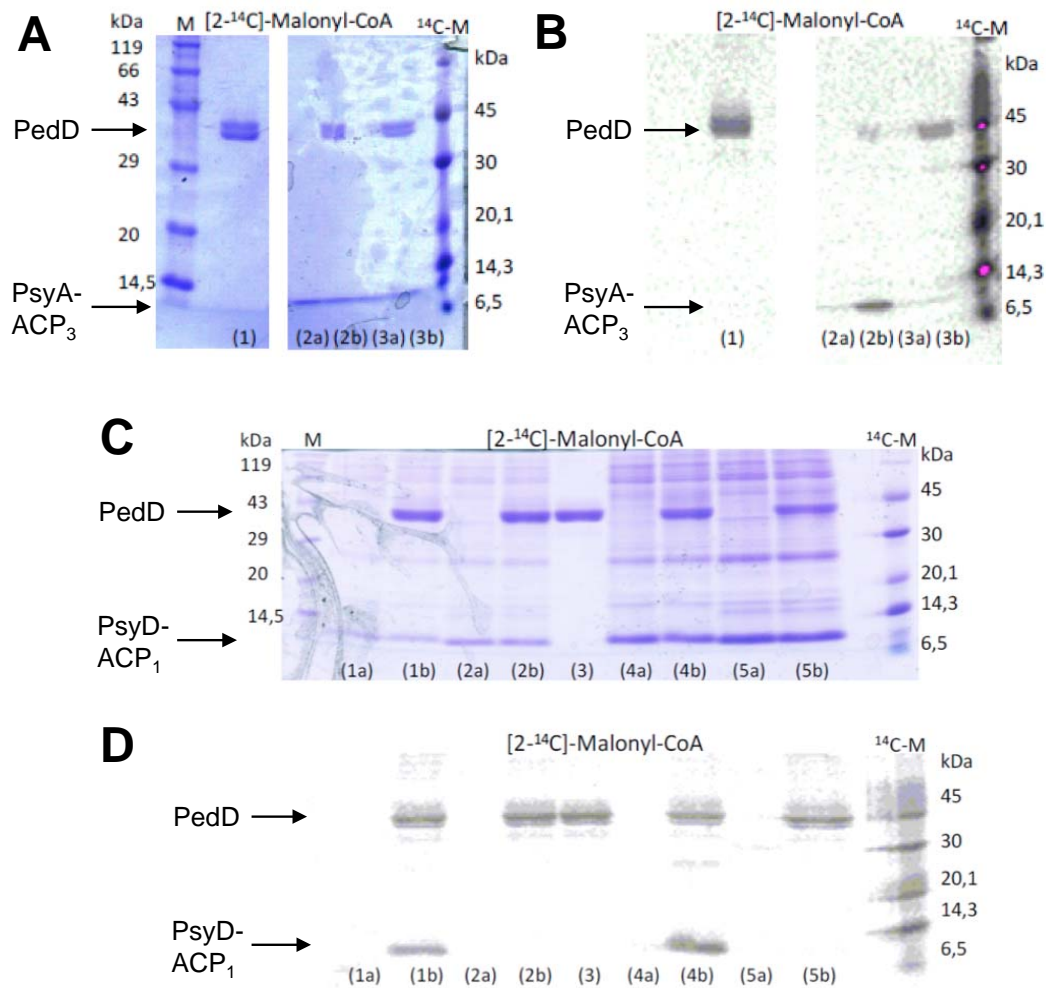

**Supplemental Figure 3, related to Figure 5.** SDS-PAGE analysis of purified PedC used for the hydrolysis assays. Samples were stained with Coomassie brilliant blue for visualization. Lane 1, molecular weight marker; lane 2: purified PedC with GroEL after affinity chromatography.

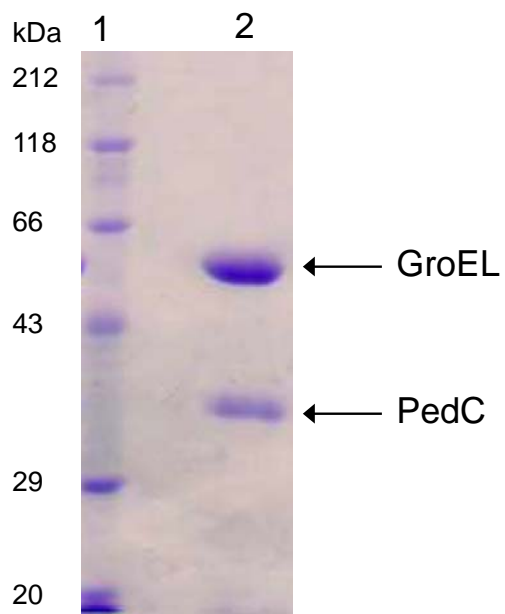

**Supplemental Figure 4, related to Figure 5.** Rate versus substrate concentration for the hydrolysis of 3-hydroxybutyryl-SNAC (**5**) by PedC. Calculated kinetic parameters are  $K_m = 88.48 \pm 27.97$  mM,  $k_{cat} = 76.48$  min<sup>-1</sup>,  $v_{max} = 0.01912 \pm 0.0041$  mM min<sup>-1</sup>, and  $k_{cat}/K_m = 14.41$  M<sup>-1</sup>s<sup>-1</sup>.

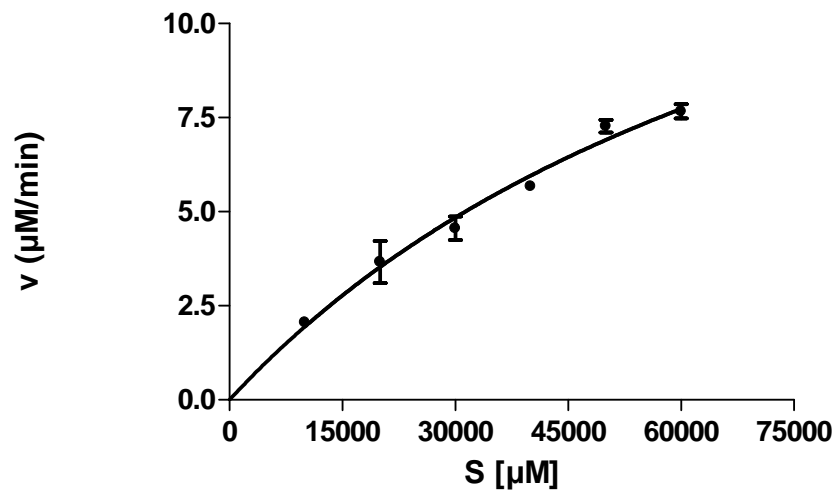

**Supplemental Table 1.** Constructs and their respective antibiotic resistance cassettes, additives, inducer and expression strains.

| <b>construct</b>                                            | <b>plasmid</b>               | <b>additive</b>                                  | <b>inducer</b>                                    | <b>expression host</b>                             |
|-------------------------------------------------------------|------------------------------|--------------------------------------------------|---------------------------------------------------|----------------------------------------------------|
| PedC<br>(C-terminal<br>strep tag)                           | pHN38<br>+ pGro7             | arabinose<br>(0.5 mg mL <sup>-1</sup> )          | anhydrotetracycline<br>(200 ng mL <sup>-1</sup> ) | <i>E. coli</i><br>BL21DE3                          |
| PedC<br>(N-terminal<br>MBP tag)                             | pH66                         | glucose<br>monohydrate<br>(2 g L <sup>-1</sup> ) | IPTG<br>(1 mM)                                    | <i>E. coli</i><br>BL21DE3                          |
| PedC<br>(C-terminal<br>His <sub>6</sub> tag)                | pET-pedC<br>+ pG-Tf2         | tetracycline<br>(50 ng mL <sup>-1</sup> )        | IPTG<br>(1 mM)                                    | <i>E. coli</i> BL21-<br>Gold(DE3)                  |
| PedD<br>(N-terminal<br>His <sub>8</sub> tag)                | pKZ178                       | -                                                | IPTG<br>(0.5 mM)                                  | <i>E. coli</i><br>BL21DE3                          |
| GroES/L                                                     | pGro7                        | arabinose<br>(0.5 mg mL <sup>-1</sup> )          | -                                                 | <i>E. coli</i><br>BL21DE3                          |
| RhiG and<br>mutants<br>(N-terminal<br>His <sub>6</sub> tag) | pNB121,<br>pNB146,<br>pNB147 | -                                                | IPTG<br>(0.5 mM)                                  | <i>E. coli</i><br>BL21DE3                          |
| PsyD-ACP1<br>(N-terminal<br>His <sub>8</sub> tag)           | pHN66,<br>pHN78              | -                                                | IPTG<br>(0.75 mM)                                 | <i>E. coli</i><br>BL21DE3                          |
| PsyA-ACP3<br>(N-terminal<br>His <sub>8</sub> tag)           | pHN60,<br>pHN77              | -                                                | IPTG<br>(0.75 mM)                                 | <i>E. coli</i><br>BL21DE3                          |
| PedN<br>(N-terminal<br>His <sub>8</sub> tag)                | pKZ124, pKZ161               | -                                                | IPTG<br>(0.4 mM)                                  | <i>E. coli</i><br>BL21DE3                          |
| PedI3<br>(N-terminal<br>His <sub>8</sub> tag)               | pKZ123, pKZ176               | -                                                | IPTG<br>(1 mM)                                    | <i>E. coli</i><br>Rosetta gami<br>2 (DE3)<br>pLysS |
| BaeB<br>(N-terminal<br>His <sub>8</sub> tag)                | pKJ7                         | -                                                | IPTG<br>(0.5 mM)                                  | <i>E. coli</i><br>BL21DE3                          |

**Supplemental Table 2:** Sequence of PCR primers used for cloning of obtained constructs. Introduced restriction sites are marked with bold letters.

| <b>Primer name</b>              | <b>Sequence (5'-3')</b>                                                   |
|---------------------------------|---------------------------------------------------------------------------|
| FP-cat- <i>Bam</i> HI           | AA <b>AGGATCC</b> GACAGCTTATCATCGGCAATA                                   |
| RP-cat- <i>Xba</i> I            | AAAT <b>CTAGAG</b> GCGTAGAGGATCTGGAGC                                     |
| RP-H-vor-Promotor- <i>Xba</i> I | AAAT <b>CTAGAT</b> TTTCTCCATCTCATACGTACTGTGGTG                            |
| FP-H-vor-Promotor- <i>Not</i> I | AA <b>AGCGG</b> CCGCCATCCGATTACGTTTATCGAAATTACG                           |
| RP-nach-BaeB-2- <i>Kpn</i> I    | AA <b>AGGTACC</b> AGAAGGCGGTCAAATGGATCA                                   |
| FP-nach-BaeB-2- <i>Apa</i> I    | AA <b>AGGGCC</b> CGTTCTATCTAACTAGCTTTTCTTTTGAGG                           |
| RP-Promotor- <i>Apa</i> I       | AA <b>AGGGCC</b> CTGTCACCATTCCCATTAAAAGAT                                 |
| FP-Promotor- <i>Bam</i> HI      | AA <b>AGGATC</b> CTAACAACGTTTATGTGAGACTAAACC                              |
| FP-erm- <i>Xba</i> I            | AAAT <b>CTAGAC</b> GAGGAATTTGTATCGATAAGAAATAG                             |
| RP-erm- <i>Apa</i> I            | AA <b>AGGGCC</b> CATAATAGGAATTGAAGTTAAATTAGATGCT                          |
| BaeB_low-GC_pHis8-3_for         | <b>GGATCC</b> ATGGATCATACATATGAAGTGCATCAA                                 |
| BaeB_low-GC_pHis8-3_rev         | <b>AAGCTT</b> TTACTTAAAATGAAACAGCCCTTTTGG                                 |
| pedC_FP                         | ATGGTAG <b>GTCTC</b> AAATGAAAGACTTGCAAAATATACAGAACAC                      |
| pedC_RP                         | ATGGTAG <b>GTCTC</b> AGCGCTACGTTGGTCGAGTTCGAGCAGA                         |
| pedC-5                          | GATACATAT <b>GAAAG</b> ACTTGCAAAATATACAGAAC                               |
| pedC-3                          | GATT <b>CTCG</b> AGACGTTGGTCGAGTTCGAGC                                    |
| pedD_FP                         | AA <b>AGAATT</b> CAAATCGTACCTTTTTCCCGGG                                   |
| pedD_RP                         | AAAA <b>AGCTT</b> TACCACACCTTTTCAACTAAA                                   |
| ped I3_pRSETf                   | AAA <b>AGATCT</b> GAGCAGAAGGTA TATGCGGTCATT                               |
| pedI3_pRSETr                    | AAA <b>AGATCT</b> TCATATCAGGCTCCGTACGTACTG                                |
| pedN_pRSETf                     | AAA <b>AGATCT</b> ATCCGCGAACGCATTTTCAATGTGATTGCGAGA<br>AATACGCTTGAAGTCCTT |
| pedN_pRSETr                     | AAA <b>AGATCT</b> TCACTGTACATACTGGCTGAG                                   |
| PsyA-ACP3 for                   | <b>GGATCC</b> ACGTCGAGCGGGAACTTGCGACAGTGG                                 |
| PsyA-ACP3 rev                   | <b>CGGCCG</b> TAAACGCATACCGCTTCGAGCTGCTGCGC                               |
| PsyD-ACP1 for                   | <b>GGATCC</b> ACTTCGTCGCCAAAGGGCAATCTGACCG                                |

|               |                                         |
|---------------|-----------------------------------------|
| PsyD-ACP1 rev | CGGCCGTCAAGGTATACACGCTTCGATGTGGGCAGCCAA |
| Expr_tAT_F    | GAATTCAGGACGAAATCTATGCCGTA              |
| Expr_tAT_R    | AAGCTTTACGATCAGCGGCTTTGTT               |

---

### Supplemental References

Moldenhauer, J., Chen, X.H., Borriss, R., and Piel, J. (2007). Biosynthesis of the antibiotic bacillaene, the product of a giant polyketide synthase complex of the trans-AT family. *Angewandte Chemie, International Edition in English* 46, 8195-8197.

Moldenhauer, J., Götz, D.C.G., Albert, C.R., Bischof, S.K., Schneider, K., Süßmuth, R.D., Engeser, M., Gross, H., Bringmann, G., and Piel, J. (2010). The final steps of bacillaene biosynthesis in *Bacillus amyloliquefaciens* FZB42: Direct evidence for beta,gamma-dehydration by a *trans*-acyltransferase polyketide synthase. *Angew. Chem. Int. Ed.* 49, 1465-1467.
